# Supplementary material
Source: MDPI journal article supplement (https://www.mdpi.com/2076-0760/12/3/128)
Supplement: s1 [file s1]

## **Supplementary materials**

### **Scenarios adopted in the study**

#### **Italian Version**

Nelle pagine che seguono, ti presenteremo una serie di scenari potenzialmente verosimili, ossia che possono presentarsi nella vita di tutti i giorni. Ti chiediamo di immaginare le diverse situazioni che ti presenteremo e di rispondere alle domande che seguiranno.

#### **Scenario n. 1:**

Matteo e Lucia sono sposati da 4 anni, dopo un fidanzamento di 2 anni. La coppia vive in una cittadina di medie dimensioni del centro-Italia.

#### **Scenario n. 2:**

Paolo e Michele sono uniti civilmente da 4 anni, dopo un fidanzamento di 2 anni. La coppia vive in una cittadina di medie dimensioni del centro-Italia

### **Ad hoc created Items**

#### **Scala di Attribuzione del Conflitto:**

Pensando ai due partner, quanto ritieni probabile che all'interno della loro coppia si verifichi una delle seguenti situazioni:

1. Che uno dei partner possa tradire l'altro/a
2. Che uno dei partner possa aggredire verbalmente l'altro/a
3. Che uno dei due partner sia eccessivamente geloso/a nei confronti dell'altro/a
4. Che uno dei due partner alzi le mani durante una discussione
5. Che i due partner decidano assieme su questioni importanti
6. Che uno dei due partner perda la calma durante una discussione
7. Che uno dei due partner abbandoni l'altro/a dopo un litigio
8. Che marito e moglie litighino di frequente (più volte in una settimana)
9. Che uno dei due partner si senta intimidito/a dall'altro/a
10. Che uno dei due partner si senta libero/a di imporre un rapporto sessuale all'altro/a
11. Che generalmente i due partner siano in disaccordo su questioni rilevanti
12. Che uno dei due partner abbia mai pensato di mettere fine alla storia
13. Che uno dei due partner si senta meno importante dell'altro/a rispetto alla posizione lavorativa
14. Che uno dei due partner eserciti una forma di controllo economico sull'altro/a (es., sul conto corrente)

15. Che uno dei due partner abbia timore nell'esprimere la propria opinione
16. Che uno dei due partner non si senta libero/a di frequentare i propri amici e le proprie amiche
17. Che uno dei due partner non si senta libero/a di frequentare la propria famiglia di origine
18. Che uno dei due partner si senta libero/a di rifiutare un rapporto sessuale all'altro/a
19. Che uno dei due partner si senta invidioso del successo lavorativo dell'altro/a
20. Che uno dei due partner sia disposto/a ad ascoltare l'altro/a
21. Che uno dei due partner si senta libero di decidere su questioni importanti senza consultare l'altro/a
22. Che uno dei due partner abbia dei segreti

### **English Version**

In the following pages, we will present you several plausible scenarios that could occur in everyday life. We ask you to imagine the various scenarios we will present you and to answer the questions that will follow.

#### **Scenario no. 1:**

Matteo and Lucia have been married for 4 years, after an engagement of 2 years. The couple lives in a medium-sized town in central Italy.

#### **Scenario no. 2:**

Paolo and Michele have been civilly united for 4 years, after a 2-year engagement. The couple lives in a medium-sized town in central Italy

### **Ad hoc created Items**

#### **Attribution of Conflict Scale**

Thinking about the two partners, what is the likelihood of any of the following situations occurring in their relationship:

1. That one partner may cheat on the other
2. That one partner may verbally assault the other
3. That one partner is extremely jealous of the other
4. That one of the partners raises his hands during a discussion
5. That the two partners reach important decisions together
6. That one of the two partners loses control during a discussion
7. That one of the partners leaves the other after a heated argument
8. That husband and wife quarrel frequently (several times per week)

9. That one of the partners feels intimidated by the other
10. That one partner feels free to impose sexual activity on the other
11. That the two partners generally disagree on relevant issues
12. That either partner ever considered of ending the story
13. That one of the two partners feels less significant than the other in terms of the job position
14. That one of the two partners exercises a form of economic control over the other (e.g., over the current account)
15. That one of the two partners is afraid to express their opinion
16. That one of the two partners does not feel free to hang out with their friends
17. That one of the two partners does not feel free to visit their family
18. That one of the two partners feels free to refuse sexual activity to the other
19. That one of the two partners feels envious of the other's work success
20. That one partner is willing to listen to the other
21. That one partner feels free to decide on important issues without consulting the other
22. That one of the two partners has secrets
